# Supplementary material
Source: PubMed Central journal article supplement (PMC3959898)
Supplement: NIHMS553884-supplement-Supp_figuresS1-S8___tableS1.pdf [file NIHMS553884-supplement-Supp_figuresS1-S8___tableS1.pdf]

## **CqsA-CqsS quorum-sensing signal-receptor specificity in *Photobacterium angustum***

Xiaobo Ke<sup>1</sup>, Laura C. Miller<sup>2</sup>, Wai-Leung Ng<sup>3</sup>, Bonnie L. Bassler<sup>1,4</sup>

<sup>1</sup>Department of Molecular Biology, Princeton University, NJ, USA

<sup>2</sup>Department of Chemistry, Princeton University, NJ, USA

<sup>3</sup>Molecular Biology & Microbiology, Tufts University, MA, USA

<sup>4</sup>Howard Hughes Medical Institute, Chevy Chase, MD, USA.

\* Correspondence: E-mail [bbassler@princeton.edu](mailto:bbassler@princeton.edu); Tel. (+1) 609 258 2857; Fax (+1) 609 258 2957.

### **Contents**

**Fig. S1. Alignment of vibrio and photobacterial CqsS homologs**

**Fig. S2. CqsS ligand specificities**

**Fig. S3. CAI-1 activity depends on a correct *cqsA*<sub>Pa</sub> reading frame**

**Fig. S4. Analysis of CAI-1 moieties produced by the *cqsA*<sub>Pa</sub> construct**

**Fig. S5. *cqsA* transcript levels from various *cqsA*<sub>Pa</sub> constructs**

**Fig. S6. Disruption of the *cqsA*<sub>Pa</sub> 5'UTR stem-loop activates protein production**

**Fig. S7. *P. angustum* growth and CAI-1 activity on different carbon sources**

**Fig. S8. *P. angustum qrr1* represses *luxR* translation**

**Table S1. Strains and plasmids**

**Supplemental References**

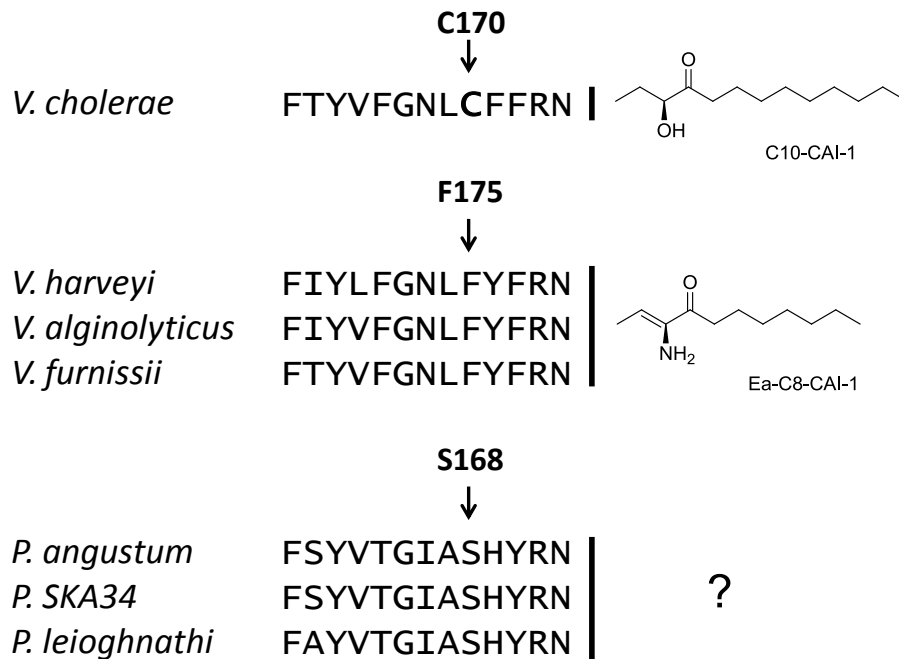

**Fig. S1. Alignment of vibrio and photobacterial CqsS homologs.** Comparison of the sixth TM helices of CqsS receptors. Cys<sup>170</sup> and Phe<sup>175</sup> are the crucial moieties for ligand detection specificity in CqsS<sub>Vc</sub> and CqsS<sub>Vh</sub>, respectively. Ser<sup>168</sup> is located at the corresponding position in CqsS<sub>Pa</sub>.

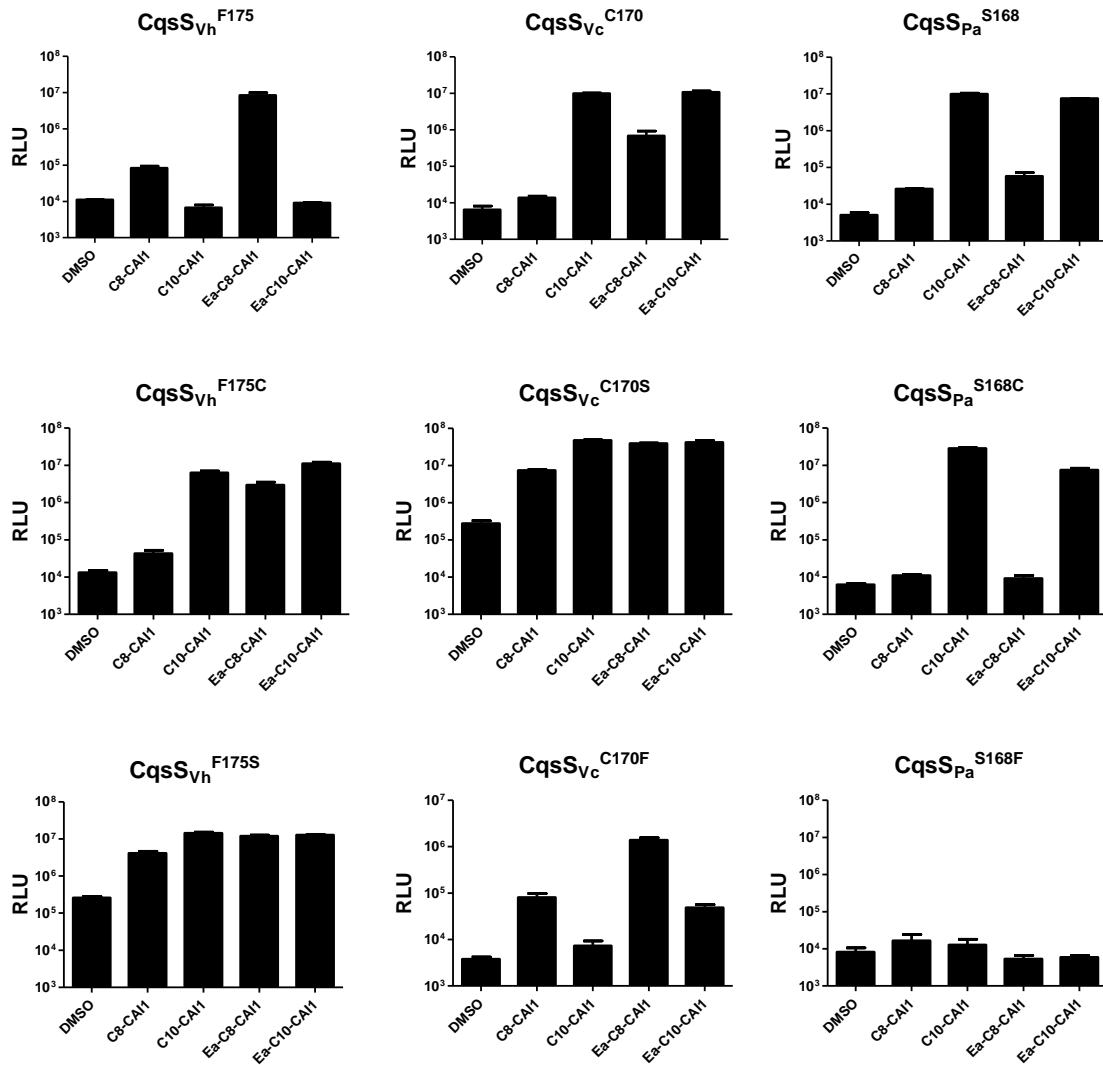

**Fig. S2. CqsS ligand specificities.** Synthetic CAI-1 compounds were added at 5  $\mu$ M to a *V. harveyi* reporter strain expressing CqsS<sub>Vh</sub>, CqsS<sub>Vc</sub>, CqsS<sub>Pa</sub> or the designated CqsS mutants. Light production was measured. Error bars represent standard deviations for three replicates.

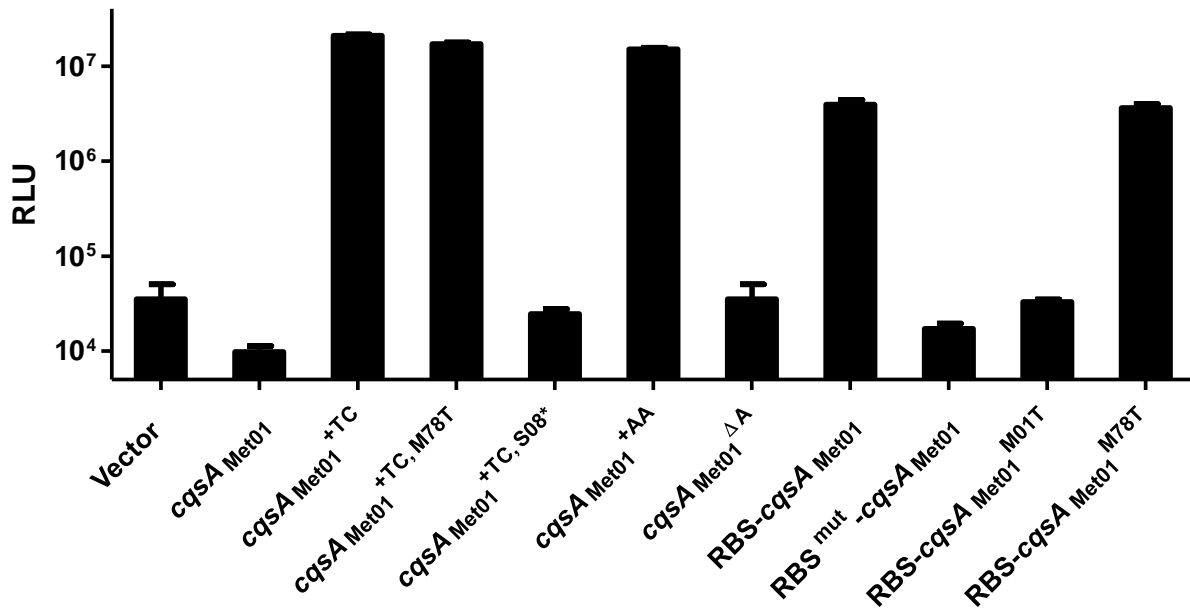

**Fig. S3. CAI-1 activity depends on a correct *cqsA*<sub>Pa</sub> reading frame.** *E. coli* harboring the designated *P. angustum* *cqsA* constructs were assayed for CAI-1 activity using the CqsS<sub>Pa</sub> bioluminescence reporter. Cell-free culture fluids were added at 1% v/v. Error bars represent standard deviations for three replicates.

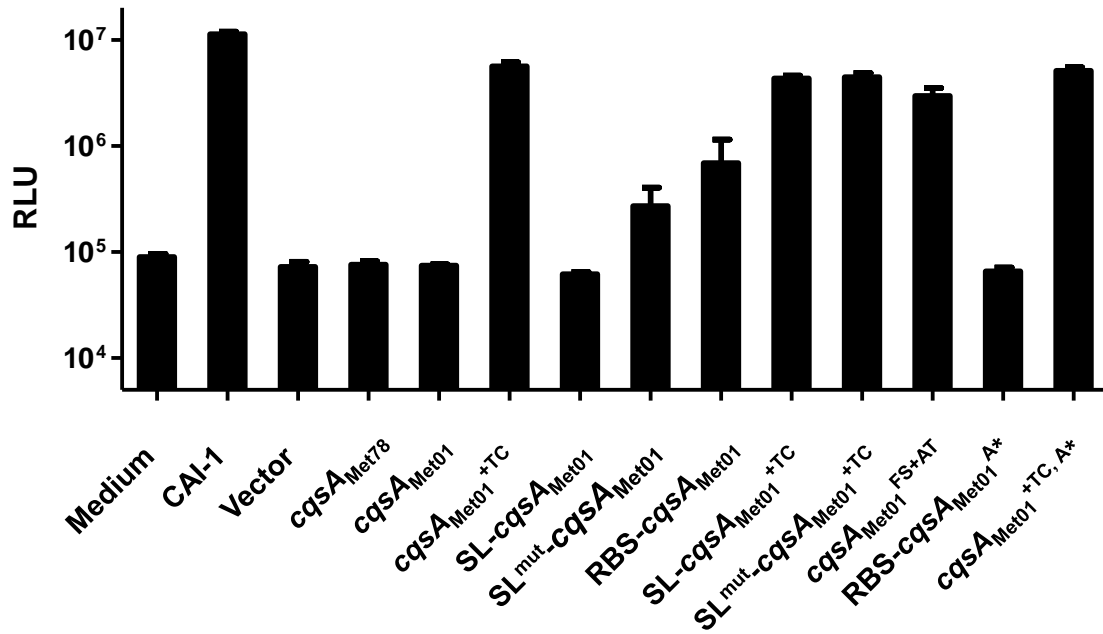

**Fig. S4. Analysis of CAI-1 moieties produced by the *cqsA*<sub>Pa</sub> construct.** *E. coli* harboring the *P. angustum cqsA* constructs in Fig. 5A were assayed for CAI-1 activity using the *CqsS*<sub>Vc</sub> bioluminescent reporter strain. Cell-free culture fluids were added at 5% v/v. Error bars represent standard deviations for three replicates.

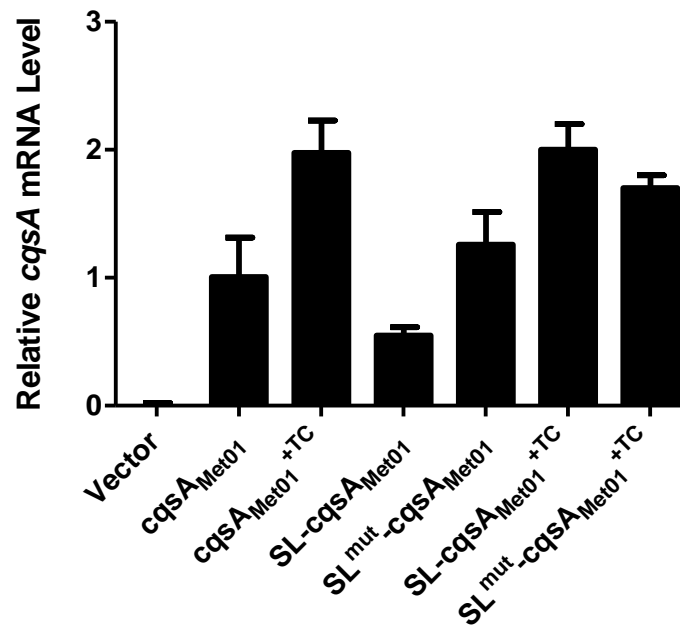

**Fig S5. *cqsA* transcript levels from various *cqsA*<sub>Pa</sub> constructs.** *E. coli* harboring the *P. angustum cqsA* constructs in Fig. 5A were grown as described for the bioluminescence assay. Cells were harvested at OD<sub>600</sub> = 1.0. Total RNA was extracted using the Qiagen RNeasy Mini Kit, and *cqsA* levels were measured by qRT-PCR. The 5S rRNA transcript was used as the internal control and all *cqsA* levels were normalized to the transcript level of the *cqsA*<sub>Met01</sub> construct. Error bars represent standard deviations for four replicates.

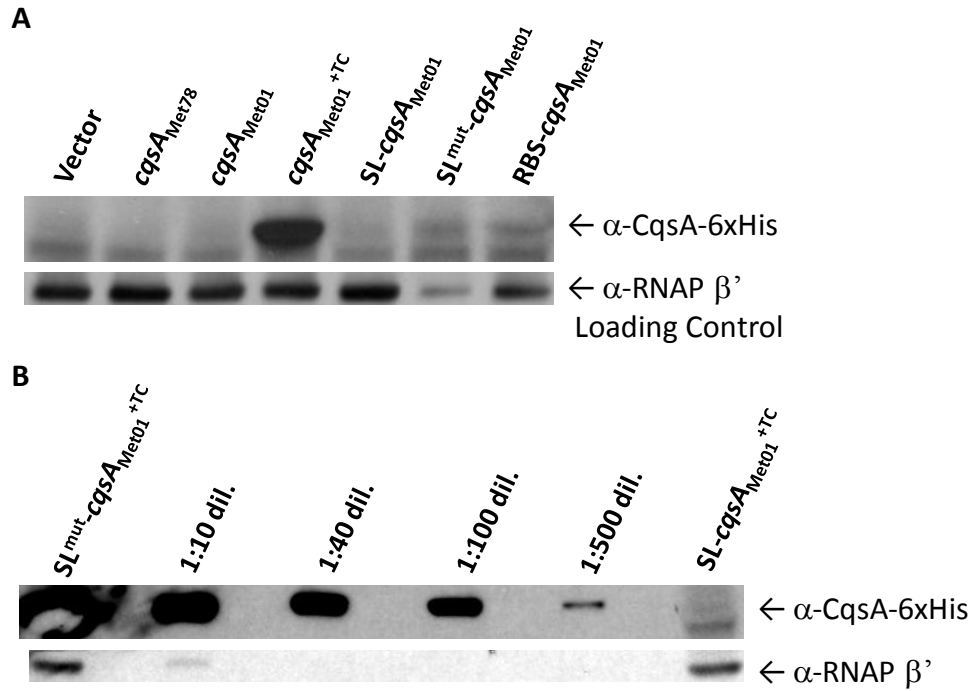

**Fig. S6. Disruption of the  $cqsA_{Pa}$  5'UTR stem-loop activates protein production. A)** Western blot analysis of 6x-His tagged CqsA protein detected in *E. coli* strains carrying the specified  $cqsA_{Pa}$  constructs. **B)** CqsA protein detected from diluted lysates prepared from the *E. coli* strain carrying the  $SL^{mut}-cqsA_{Met01}^{+TC}$  construct.

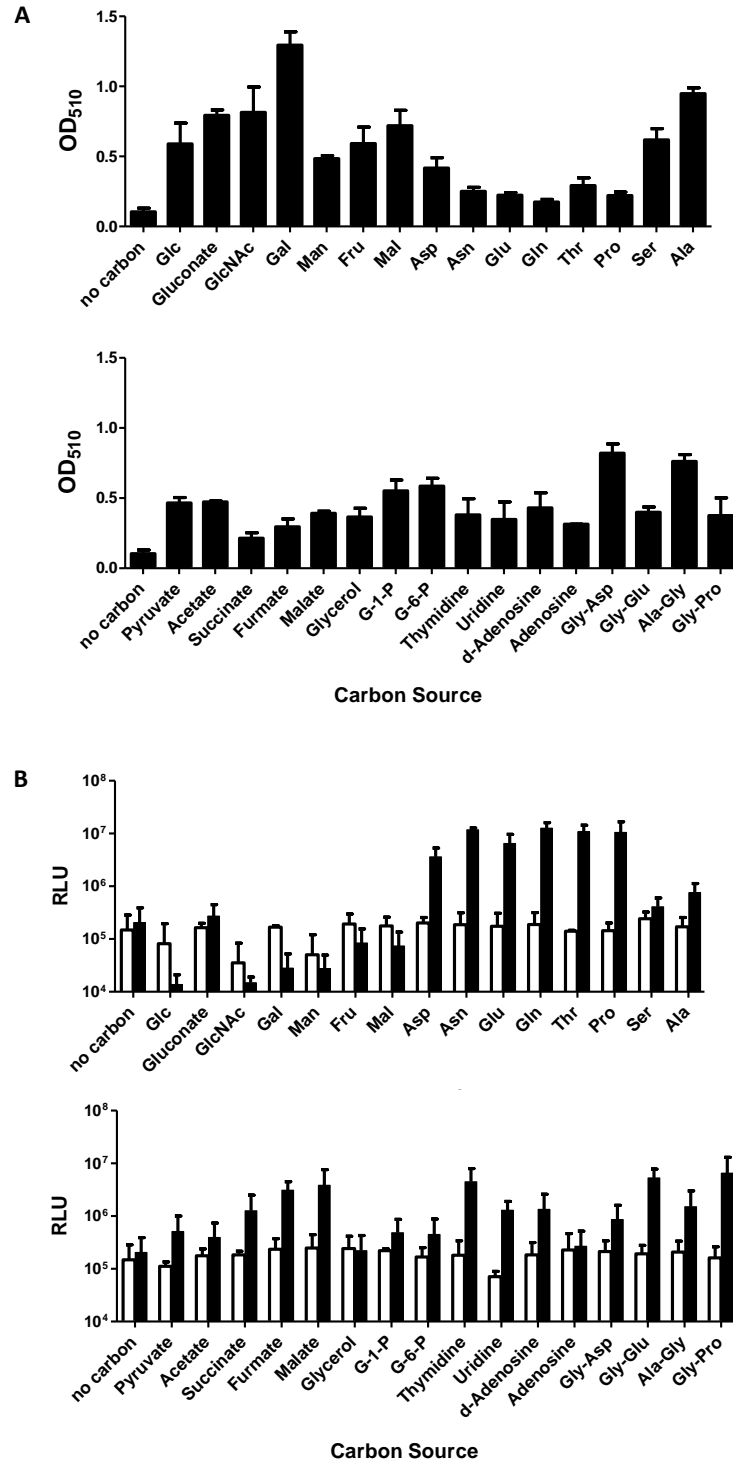

**Fig. S7. *P. angustum* growth and CAI-1 activity on different carbon sources. A)** *P. angustum* growth on various carbon sources was measured by absorbance (OD<sub>510</sub>). **B)** CAI-1 activity in *P. angustum* culture fluids following growth on the carbon sources from panel A was assayed using the bioluminescent reporter strain carrying *cqsS<sub>Pa</sub>*. Media controls (white) and *P. angustum* culture fluids (black) were added at 50% v/v. Error bars represent standard deviations for two replicates.



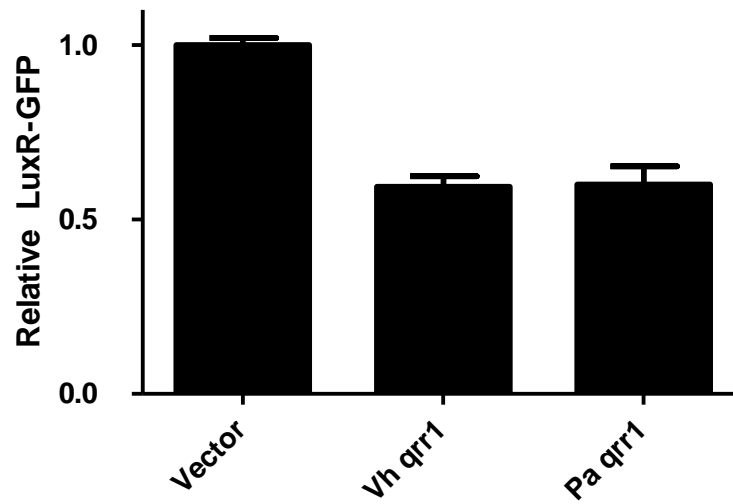

**Fig. S8. *P. angustum qrr1* represses *luxR* translation.** *E. coli* carrying a LuxR-GFP fusion (pYS141) were transformed with constructs carrying pRHA109 (vector), *V. harveyi* (Vh) *qrr1*, or *P. angustum* (Pa) *qrr1*. *luxR* and *qrr1* expression were induced by 10  $\mu$ M IPTG and 10 mM L-Rhamnose, respectively. GFP levels were measured using an Envison Multilabel Reader following 16 h incubation at 37°C. GFP levels were normalized to the vector control. Error bars represent standard deviations for three replicates.

**Table S1. Strains and plasmids**

| Plasmid or Strain | Relevant genotype or feature                                                                                  | Reference                       |
|-------------------|---------------------------------------------------------------------------------------------------------------|---------------------------------|
| <b>Plasmid</b>    |                                                                                                               |                                 |
| pLAFR2            | Broad-host-range cosmid; mob, Tet <sup>R</sup>                                                                | (Friedman <i>et al.</i> , 1982) |
| pJMH282           | <i>V. harveyi cqsS</i> on pLAFR2, Tet <sup>R</sup>                                                            | (Henke and Bassler, 2004)       |
| pXKE220           | <i>V. harveyi cqsS</i> <sup>F175C</sup> on pLAFR2, Tet <sup>R</sup>                                           | This study                      |
| pXKE165           | <i>V. harveyi cqsS</i> <sup>F175S</sup> on pLAFR2, Tet <sup>R</sup>                                           | This study                      |
| pXKE071           | <i>V. cholerae cqsS</i> on pLAFR2, Tet <sup>R</sup>                                                           | This study                      |
| pXKE167           | <i>V. cholerae cqsS</i> <sup>C170S</sup> on pLAFR2, Tet <sup>R</sup>                                          | This study                      |
| pXKE222           | <i>V. cholerae cqsS</i> <sup>C170F</sup> on pLAFR2, Tet <sup>R</sup>                                          | This study                      |
| pXKE554           | <i>P. angustum</i> S14 <i>cqsS</i> on pLAFR2, Tet <sup>R</sup>                                                | This study                      |
| pWN1671           | <i>P. angustum</i> B70 <i>cqsS</i> on pLAFR2, Tet <sup>R</sup>                                                | This study                      |
| pXKE166           | <i>P. angustum</i> B70 <i>cqsS</i> <sup>S168C</sup> on pLAFR2, Tet <sup>R</sup>                               | This study                      |
| pXKE168           | <i>P. angustum</i> B70 <i>cqsS</i> <sup>S168F</sup> on pLAFR2, Tet <sup>R</sup>                               | This study                      |
| pEVS143           | P15A <i>oriV</i> , <i>lac</i> <sup>I</sup> , P <sub><i>tac</i></sub> expression cassette, Kan <sup>R</sup>    | (Bose <i>et al.</i> , 2008)     |
| pXKE1054          | <i>P. angustum cqsA</i> <sub>Met01</sub> on pEVS143, untagged, Kan <sup>R</sup>                               | This study                      |
| pXKE903           | <i>P. angustum cqsA</i> <sub>Met01</sub> <sup>+TC</sup> on pEVS143, untagged, Kan <sup>R</sup>                | This study                      |
| pXKE909           | <i>P. angustum cqsA</i> <sub>Met01</sub> <sup>+TC, S08*</sup> on pEVS143, untagged, Kan <sup>R</sup>          | This study                      |
| pXKE907           | <i>P. angustum cqsA</i> <sub>Met01</sub> <sup>+AA</sup> on pEVS143, untagged, Kan <sup>R</sup>                | This study                      |
| pXKE1055          | <i>P. angustum</i> RBS- <i>cqsA</i> <sub>Met01</sub> on pEVS143, untagged, Kan <sup>R</sup>                   | This study                      |
| pXKE1325          | <i>P. angustum</i> RBS <sup>mut</sup> - <i>cqsA</i> <sub>Met01</sub> on pEVS143, untagged, Kan <sup>R</sup>   | This study                      |
| pXKE933           | <i>P. angustum</i> RBS- <i>cqsA</i> <sub>Met01</sub> <sup>M01T</sup> on pEVS143, untagged, Kan <sup>R</sup>   | This study                      |
| pXKE919           | <i>P. angustum</i> RBS- <i>cqsA</i> <sub>Met01</sub> <sup>M78T</sup> on pEVS143, untagged, Kan <sup>R</sup>   | This study                      |
| pXKE1360          | <i>P. angustum cqsA</i> <sub>Met78</sub> on pEVS143, C-terminal 6xHis-tagged, Kan <sup>R</sup>                | This study                      |
| pXKE1128          | <i>P. angustum cqsA</i> <sub>Met01</sub> on pEVS143, C-terminal 6xHis-tagged, Kan <sup>R</sup>                | This study                      |
| pXKE1331          | <i>P. angustum cqsA</i> <sub>Met01</sub> <sup>+TC</sup> on pEVS143, C-terminal 6xHis-tagged, Kan <sup>R</sup> | This study                      |

|                           |                                                                                                                                          |                                                               |
|---------------------------|------------------------------------------------------------------------------------------------------------------------------------------|---------------------------------------------------------------|
| pXKE1459                  | <i>P. angustum</i> <i>cqsA</i> <sub>Met01</sub> <sup>+TC, M78T</sup> on pEVS143, C-terminal 6xHis-tagged, Kan <sup>R</sup>               | This study                                                    |
| pXKE1334                  | <i>P. angustum</i> SL- <i>cqsA</i> <sub>Met01</sub> on pEVS143, C-terminal 6xHis-tagged, Kan <sup>R</sup>                                | This study                                                    |
| pXKE1336                  | <i>P. angustum</i> SL <sup>mut</sup> - <i>cqsA</i> <sub>Met01</sub> on pEVS143, C-terminal 6xHis-tagged, Kan <sup>R</sup>                | This study                                                    |
| pXKE1130                  | <i>P. angustum</i> RBS- <i>cqsA</i> <sub>Met01</sub> on pEVS143, C-terminal 6xHis-tagged, Kan <sup>R</sup>                               | This study                                                    |
| pXKE1343                  | <i>P. angustum</i> SL- <i>cqsA</i> <sub>Met01</sub> <sup>+TC</sup> on pEVS143, C-terminal 6xHis-tagged, Kan <sup>R</sup>                 | This study                                                    |
| pXKE1345                  | <i>P. angustum</i> SL <sup>mut</sup> - <i>cqsA</i> <sub>Met01</sub> <sup>+TC</sup> on pEVS143, C-terminal 6xHis-tagged, Kan <sup>R</sup> | This study                                                    |
| pXKE1132                  | <i>P. angustum</i> <i>cqsA</i> <sub>Met01</sub> <sup>FS+AT</sup> on pEVS143, C-terminal 6xHis-tagged, Kan <sup>R</sup>                   | This study                                                    |
| pXKE1366                  | <i>P. angustum</i> RBS- <i>cqsA</i> <sub>Met01</sub> <sup>A*</sup> on pEVS143, C-terminal 6xHis-tagged, Kan <sup>R</sup>                 | This study                                                    |
| pXKE1368                  | <i>P. angustum</i> <i>cqsA</i> <sub>Met01</sub> <sup>+TC, A*</sup> on pEVS143, C-terminal 6xHis-tagged, Kan <sup>R</sup>                 | This study                                                    |
| <b><i>P. angustum</i></b> |                                                                                                                                          |                                                               |
| S14                       | Wildtype, surface water isolate (1 m, Botany Bay, Sydney Australia)                                                                      | (Humphrey <i>et al.</i> , 1983)                               |
| B70                       | Wildtype, seawater isolate (7.5 m, latitude 20°30', longitude 157°30')                                                                   | (Baumann <i>et al.</i> , 1971; Reichelt <i>et al.</i> , 1976) |
| <b><i>V. cholerae</i></b> |                                                                                                                                          |                                                               |
| C6706str                  | Wild type                                                                                                                                | (Thelin and Taylor, 1996)                                     |
| <b><i>V. harveyi</i></b>  |                                                                                                                                          |                                                               |
| BB120                     | Wild type                                                                                                                                | (Bassler <i>et al.</i> , 1997)                                |
| JMH603                    | $\Delta cqsA$                                                                                                                            | (Henke and Bassler, 2004)                                     |
| WN1397                    | $\Delta cqsAS::Cm^f$ , $\Delta luxN$ , $\Delta luxPQ$                                                                                    | (Ng <i>et al.</i> , 2011)                                     |
| WN1490                    | $\Delta cqsAS::Cm^f$ , $\Delta luxN$ , $\Delta luxPQ$ / pLAFR2 (Vector)                                                                  | (Ng <i>et al.</i> , 2011)                                     |
| WN1492                    | $\Delta cqsAS::Cm^f$ , $\Delta luxN$ , $\Delta luxPQ$ / pJMH282 ( <i>cqsS</i> <sub>Vh</sub> )                                            | (Ng <i>et al.</i> , 2011)                                     |
| XKE226                    | $\Delta cqsAS::Cm^f$ , $\Delta luxN$ , $\Delta luxPQ$ / pXKE220 ( <i>cqsS</i> <sub>Vh</sub> <sup>F175C</sup> )                           | This study                                                    |
| XKE169                    | $\Delta cqsAS::Cm^f$ , $\Delta luxN$ , $\Delta luxPQ$ / pXKE165 ( <i>cqsS</i> <sub>Vh</sub> <sup>F175S</sup> )                           | This study                                                    |
| XKE083                    | $\Delta cqsAS::Cm^f$ , $\Delta luxN$ , $\Delta luxPQ$ / pXKE071 ( <i>cqsS</i> <sub>Vc</sub> )                                            | This study                                                    |
| XKE175                    | $\Delta cqsAS::Cm^f$ , $\Delta luxN$ , $\Delta luxPQ$ / pXKE167 ( <i>cqsS</i> <sub>Vc</sub> <sup>C170S</sup> )                           | This study                                                    |

|         |                                                                                             |            |
|---------|---------------------------------------------------------------------------------------------|------------|
| XKE228  | $\Delta cqsAS::Cm^r$ , $\Delta luxN$ , $\Delta luxPQ$ / pXKE222 ( $cqsS_{Vc}^{C170F}$ )     | This study |
| XKE557  | $\Delta cqsAS::Cm^r$ , $\Delta luxN$ , $\Delta luxPQ$ / pXKE554 ( $cqsS_{Pa S14}$ )         | This study |
| WN1674  | $\Delta cqsAS::Cm^r$ , $\Delta luxN$ , $\Delta luxPQ$ / pWN1671 ( $cqsS_{Pa B70}$ )         | This study |
| pXKE173 | $\Delta cqsAS::Cm^r$ , $\Delta luxN$ , $\Delta luxPQ$ / pXKE166 ( $cqsS_{Pa B70}^{S168C}$ ) | This study |
| pXKE177 | $\Delta cqsAS::Cm^r$ , $\Delta luxN$ , $\Delta luxPQ$ / pXKE168 ( $cqsS_{Pa B70}^{S168F}$ ) | This study |

## Supplemental References

- Bassler, B.L., Greenberg, E. P., and Stevens, A. M. (1997). Cross-species induction of luminescence in the quorum-sensing bacterium *Vibrio harveyi*. *J Bacteriol* **179**: 4043–4045.
- Baumann, P., Baumann, L., and Mandel, M. (1971) Taxonomy of marine bacteria: the genus *Beneckea*. *J Bacteriol* **107**: 268–294.
- Bose, J.L., Rosenberg, C.S., and Stabb, E. V (2008) Effects of *luxCDABEG* induction in *Vibrio fischeri*: enhancement of symbiotic colonization and conditional attenuation of growth in culture. *Arch Microbiol* **190**: 169–183.
- Friedman, A.M., Long, S.R., Brown, S.E., Buikema, W.J., and Ausubel, F.M. (1982) Construction of a broad host range cosmid cloning vector and its use in the genetic analysis of *Rhizobium* mutants. *Gene* **18**: 289–296.
- Henke, J.M., and Bassler, B.L. (2004) Three parallel quorum-sensing systems regulate gene expression in *Vibrio harveyi*. *J Bacteriol* **186**: 6902–6914.
- Humphrey, B., Kjelleberg, S., and Marshall, K.C. (1983) Responses of marine bacteria under starvation conditions at a solid-water interface. *Appl Environ Microbiol* **45**: 43–47.
- Ng, W.-L., Perez, L.J., Wei, Y., Kraml, C., Semmelhack, M.F., and Bassler, B.L. (2011) Signal production and detection specificity in *Vibrio* CqsA/CqsS quorum-sensing systems. *Mol Microbiol* **79**: 1407–1417.
- Reichert, J.L., Baumann, P., and Baumann, L. (1976) Study of genetic relationships among marine species of the genera *Beneckea* and *Photobacterium* by means of *in vitro* DNA/DNA hybridization. *Arch Microbiol* **110**: 101–120.
- Thelin, K.H., and Taylor, R.K. (1996) Toxin-coregulated pilus, but not mannose-sensitive hemagglutinin, is required for colonization by *Vibrio cholerae* O1 El Tor biotype and O139 strains. *Infect Immun* **64**: 2853–2856.
